# Supplementary material for: Impact of habitat loss on the diversity and structure of ecological networks between oxyurid nematodes and spur-thighed tortoises (Testudo graeca L.)
Source: PeerJ. 2019 Dec 2;7:e8076. doi: 10.7717/peerj.8076 (PMC6894431; doi:10.7717/peerj.8076)
Supplement: Supplemental Information 2 — Tortoises’ (Testudo graeca) traits, growth rates and oxyurid nematode infestation at different levels of habitat loss. [file peerj-07-8076-s002.xlsx]

## Sheet: Traits
LEVEL OF HABITAT LOSS	WEIGHT (mm)	CARAPACE LENGHT (mm)	GROWTH RATE (mm/year)	TOTAL NEMATODES	NEMATODE SPECIES RICHNESS
LOW	690	149.42	0.136258	4094	6
LOW	500	129.08	0.213445	3604	7
LOW	130	82.32	0.105336	0	0
LOW	156	86.89	0.100398	15	2
LOW	370	116.13	0.166101	9	2
LOW	360	118.47	0.0836112	24	5
LOW	92	71.3	0.0612414	0	0
LOW	150	82.63	0.0759188	3	1
LOW	255	106.84	0.0803642	3	1
LOW	760	153.26	0.115127	60	4
LOW	360	115.2	0.126346	0	0
LOW	128	77.83	0.0595327	0	0
LOW	660	142.04	0.114801	15	2
LOW	740	149.06	0.146533	42	5
LOW	262	113.02	0.126096	3	1
LOW	640	140.77	0.0906586	155	5
LOW	840	153	0.400557	54	7
LOW	242	104.63	0.104835	6	2
LOW	352	118.71	0.183406	6	2
LOW	460	134.45	0.074354	15	2
LOW	520	127.66	0.0851446	6	2
LOW	13	37	0.00190018	0	0
LOW	1220	177	0.0722975	0	0
LOW	600	135.59	0.0185261	12	3
LOW	18.5	41.59	0.0789113	0	0
LOW	730	144.41	0.037232	24	3
LEVEL OF HABITAT LOSS	WEIGHT (mm)	CARAPACE LENGHT (mm)	GROWTH RATE (mm/year)	TOTAL NEMATODES	NEMATODE SPECIES RICHNESS
INTERMEDIATE	450	120.83	0.0875756	1866	9
INTERMEDIATE	292	107.85	0.0866691	1651	5
INTERMEDIATE	25	47.81	0.0324092	0	0
INTERMEDIATE	870	154	0.110806	124	9
INTERMEDIATE	940	130.6	0.326769	12	2
INTERMEDIATE	15.5	45.54	0.037232	3	1
INTERMEDIATE	80	70.01	0.0703229	0	0
INTERMEDIATE	25.75	49.27	0.0374564	0	0
INTERMEDIATE	590	140.2		186	8
INTERMEDIATE	52	59.54	0.0555519	0	0
INTERMEDIATE	240	97.84	0.0936001	0	0
INTERMEDIATE	120	78.66	0.0673577	0	0
INTERMEDIATE	350	118.19	0.123621	3	1
INTERMEDIATE	330	114.69	0.124134	3	1
INTERMEDIATE	520	133.94	0.0785122	94	6
INTERMEDIATE	75	67.72	0.0458178	17	2
INTERMEDIATE	148	80.47	0.0554089	3	1
INTERMEDIATE	66	64.24		24	3
INTERMEDIATE	92	74.78	0.0593172	15	4
INTERMEDIATE	66	65.08	0.0411949	0	0
LEVEL OF HABITAT LOSS	WEIGHT (mm)	CARAPACE LENGHT (mm)	GROWTH RATE (mm/year)	TOTAL NEMATODES	NEMATODE SPECIES RICHNESS
HIGH	168	88.25	0.0973276	420	7
HIGH	450	120.29	0.0794741	48	7
HIGH	410	117.66	0.0696146	20	4
HIGH	26	49.03	0.0364406	0	0
HIGH	274	107.3	0.151719	15	1
HIGH	560	134.22	0.117025	689	8
HIGH	140	81.06	0.0725599	3	1
HIGH	470	131.06	0.4559	0	0
HIGH	400	110.56	0.100982	531	10
HIGH	810	149.08	0.2512	64	8
HIGH	18	41.54	0.0120372	0	0
HIGH	310	107.03	0.122995	59	4
HIGH	630	137.78	0.0908667	15	3
HIGH	820	155	0.120611	5245	8
HIGH	1040	172	0.291157	0	0
HIGH	780	152.23	0.105621	44	3
HIGH	440	121.81	0.0819085	27	2
HIGH	200	89.72	0.0814695	16	1
HIGH	78	68.5	0.0661818	0	0
HIGH	178	86.72	0.07487	10	4
